# Supplementary material for: Antimony speciation in spirits stored in PET bottles: identification of a novel antimony complex
Source: Royal Society of Chemistry journal article supplement (doi:10.1039/c7ja00037e), 2017-01-01

**Antimony Speciation in Spirits Stored in PET Bottles:  
Identification of a Novel Antimony Complex**

S. Carneado<sup>1</sup>, J.F. López-Sánchez<sup>1</sup>, A. Sahuquillo<sup>1</sup>, E. Klontzas<sup>2</sup>, G. E. Froudakis<sup>2</sup>, S.A. Pergantis<sup>2,3,\*</sup>

<sup>1</sup>Section of Analytical Chemistry, University of Barcelona, Martí i Franqués, 1-11, 08028 Barcelona, Spain.

<sup>2</sup> Department of Chemistry, University of Crete, Voutes, 71003 Heraklion, Greece.

<sup>3</sup> Environmental Chemical Processes Laboratory

E-mail addresses: [sergio\\_carneado@ub.edu](mailto:sergio_carneado@ub.edu) (S.Carneado); [fermin.lopez@ub.edu](mailto:fermin.lopez@ub.edu) (J.F. López-Sánchez);  
[angels.sahuquillo@ub.edu](mailto:angels.sahuquillo@ub.edu) (A. Sahuquillo); [spergantis@chemistry.uoc.gr](mailto:spergantis@chemistry.uoc.gr) (S.A. Pergantis)

\* Corresponding author: Environmental Chemical Processes Laboratory, Department of Chemistry, University of Crete, Voutes 71003, Heraklion, Greece. E-mail: [spergantis@chemistry.uoc.gr](mailto:spergantis@chemistry.uoc.gr); Fax: +30 2810 545001; Tel: +30 2810 545084

**SUPPLEMENTARI MATERIAL**

Figure S1. Tandem mass spectra of the target m/z. A: MS<sup>2</sup> on m/z 475; B: MS<sup>3</sup> on m/z 457; C: MS<sup>4</sup> on m/z 367; D: MS<sup>4</sup> on m/z 349; E: MS<sup>5</sup> on m/z 259; F: MS<sup>5</sup> on m/z 241.

Figure S1

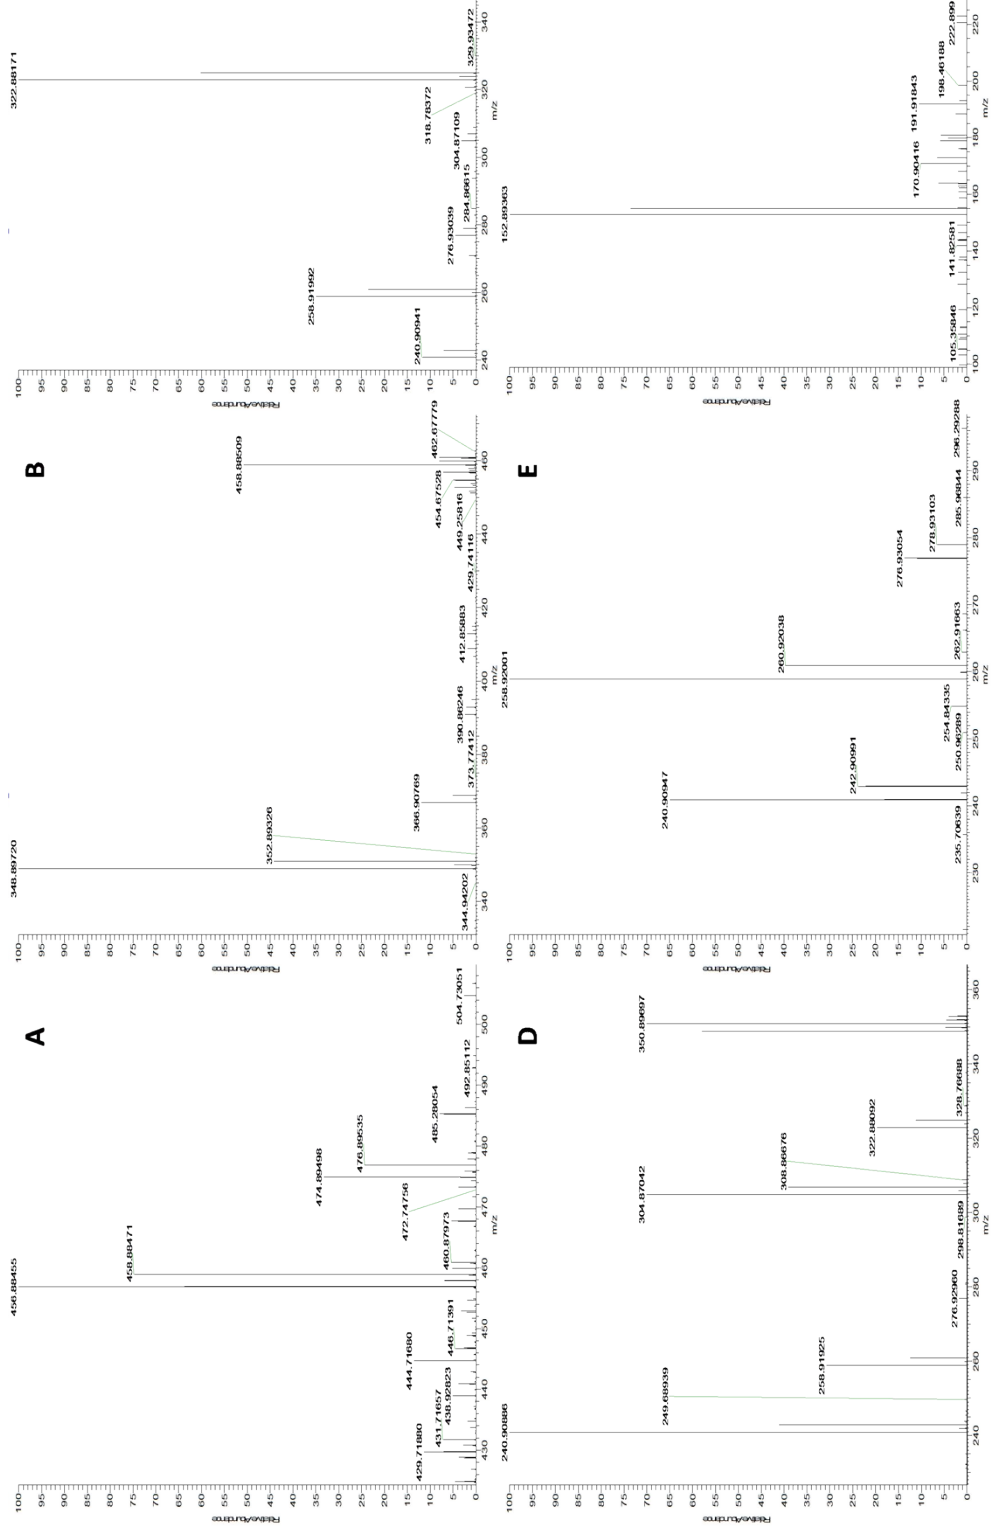

Supplement: c7ja00037e1.pdf [file c7ja00037e1.pdf]
